# Supplementary material
Source: MDPI journal article supplement (https://www.mdpi.com/2306-5338/8/3/118)
Supplement: s1 [file s1]

Table S1. groundwater levels from water wells coded from W1 to W10 (see Figure 1 for the corresponding location in the study area).

| Water Well | Topographic level (in<br>m a.s.l.) | Groundwater Level (in<br>m a.s.l.) | Year | Proximity to river<br>section |
|------------|------------------------------------|------------------------------------|------|-------------------------------|
| W1         | 126                                | 119                                | 2016 | S2                            |
| W2         | 122                                | 117                                | 1987 | S2                            |
| W3         | 104                                | 96                                 | 1995 | S3                            |
| W4         | 102                                | 87                                 | 1997 | S4                            |
| W5         | 94                                 | 79                                 | 1999 | S5                            |
| W6         | 101                                | 80                                 | 2005 | n.a.                          |
| W7         | 98                                 | 82                                 | 2005 | S4                            |
| W8         | 84                                 | 68                                 | 2005 | n.a.                          |
| W9         | 63                                 | 58                                 | 2005 | n.a.                          |
| W10        | 78                                 | 68                                 | 2005 | n.a                           |
